1 Title: A honey bee symbiont buffers larvae against nutritional stress through lysine  
2 supplementation

3 Authors: Audrey J. Parish, Danny W. Rice, Vicki M. Tanquary, Jason M. Tennessen, \*Irene L.G.  
4 Newton

5 Affiliations: Indiana University Department of Biology

6 \*corresponding author

7

8

9 **Abstract**

10 Honey bees, the world's most significant agricultural pollinator, have suffered dramatic losses in  
11 the last few decades (1, 2). These losses are largely due to the synergistic effects of multiple  
12 stressors, the most pervasive of which is limited nutrition (3–5). The effects of poor nutrition are  
13 most damaging in the developing larvae of honey bees, who mature into workers unable to  
14 meet the needs of their colony (6–8). It is therefore essential that we better understand the  
15 nutritional landscape experienced by honey bee larvae. In this study, we characterize the  
16 metabolic capabilities of a honey bee larvae-associated bacterium, *Bombella apis* (formerly  
17 *Parasaccharibacter apium*), and its effects on the nutritional resilience of larvae. We found that  
18 *B. apis* is the only bacterium associated with larvae that can withstand the antimicrobial larval  
19 diet. Further, we found that *B. apis* can synthesize all essential amino acids and significantly  
20 alters the amino acid content of synthetic larval diet, largely by increasing the essential amino  
21 acid lysine. Analyses of gene gain/loss across the phylogeny suggest that two distinct cationic  
22 amino acid transporters were gained by *B. apis* ancestors, and the transporter LysE is  
23 conserved across all sequenced strains of *B. apis*. This result suggests that amino acid export is  
24 a key feature conserved within the *Bombella* clade. Finally, we tested the impact of *B. apis* on  
25 developing honey bee larvae subjected to nutritional stress and found that larvae supplemented  
26 with *B. apis* are bolstered against mass reduction despite limited nutrition. Together, these data  
27 suggest an important role of *B. apis* as a nutritional mutualist of honey bee larvae.

28 **Introduction**

29 All metazoan evolution has occurred in the context of microorganisms, which exist in and  
30 around all living things. Consequently, mutualism between microbes and animal hosts is an  
31 ancient and widespread phenomenon (see (9)). Bacterial symbionts can have dramatic effects  
32 on animal hosts, including nutrient supplementation of incomplete host diets (10–13), protection  
33 from parasites and pathogens (14–16), and providing developmental cues (14, 17–21). Many  
34 eukaryotic hosts rely on bacterial partners for fundamental aspects of their metabolism, such as  
35 providing key nutrients absent or insufficient in the host diet (12, 22–24). In fact, the ecological  
36 variety of insects on earth is due in part to their ability to form new niches in previously  
37 inhospitable nutritional conditions, an accomplishment often achieved via association with  
38 bacterial partners (25–27). The European honey bee, *Apis mellifera*, is an excellent exemplar of  
39 this phenomenon, whereby the gut microbiome allows the colony to subsist upon recalcitrant  
40 plant pollen and nectar (28–31).

41 Honey bees are essential for pollinating food crops, resulting in a multi-billion-dollar global  
42 industry(32). However, managed honey bee colonies have suffered substantial losses in the last  
43 two decades (1). US beekeepers reported losing 40.5% of their managed colonies between  
44 2015 and 2016 alone (2). These declines are often credited to a combination of stressors, the  
45 crux of which is poor nutrition (3–5). Poor nutrition for managed honey bee colonies is partly due  
46 to dwindling natural floral resources and an increase in reliance on large monoculture crops (33,  
47 34). These large monocultures pose especially difficult nutritional landscapes for honey bees, as  
48 pollen from most individual crops only barely provides a colony's base nutritional requirements  
49 (35, 36). This discrepancy between available and required protein is most problematic for  
50 larvae, the immature stage of honey bee workers (6). Ample multifloral pollen protein is required  
51 for honey bee larval development, and insufficient protein during this stage can have cascading  
52 effects through the colony (6, 7). Larvae deprived of adequate protein mature into adults who  
53 are stunted in size and deficient in their ability to forage for floral resources, further exacerbating  
54 nutritional stress to the next generation of brood and compromising colony dynamics (7, 8).  
55 Additionally, honey bees raised on pollen containing inadequate protein are significantly more  
56 likely to fall victim to secondary stressors such as viral pathogens, *Varroa destructor* mites, and  
57 *Nosema apis* infection (4, 5, 37, 38).

58 However, the microbiome can significantly modulate larval nutrition in holometabolous insects  
59 (12, 39, 40). The adaptive decoupling of larval and adult phases, which dedicates the larval  
60 phase to growth, creates an opportunity for growth-promoting nutritional symbionts to associate  
61 specifically with larvae (41, 42). The most extensively studied examples of nutritional symbionts  
62 of larvae come from studies in *Drosophila melanogaster*, where just a single member of the  
63 microbiome can rescue larval growth despite severe protein limitation (17, 43). Yet less is  
64 known about how the microbial communities associated with honey bee larvae contribute to  
65 their nutrition and development. Honey bee larvae are nurtured by their adult nestmates, who  
66 feed them a larval diet of nectar, pollen, and royal jelly (44). This larval diet is strikingly low in  
67 bacterial diversity and is occupied predominantly by the bacterium *Bombella apis* (formerly  
68 *Parasaccharibacter apium*), *Lactobacillus*, and *Fructobacillus* species (45, 46). *B. apis* is  
69 consistently associated with honey bee larvae, larval diet, and the adult glands which secrete  
70 royal jelly, but is not found in large numbers in the adult worker gut (45–48). Therefore, *B. apis*  
71 seems particularly well positioned to serve a nutritional role in honey bee larval development.

72 Here, we present data showing that indeed, *B. apis* is supplementing honey bee larvae through  
73 its secretion of essential amino acids. We first asked which bacterial members of the honey bee  
74 larval microbiome community can survive in the *in vitro* larval diet by subjecting a panel of  
75 strains to media containing a gradient of royal jelly. We subsequently performed a comparative  
76 genomic analysis across all sequenced strains of *Bombella* and related *Saccharibacter* to  
77 identify significant gene conservation and gene gain/loss. This study confirmed that all *B. apis*  
78 strains can synthesize all amino acids and have acquired multiple amino acid transporters. We  
79 then selected one strain of *Bombella apis*, A29, and performed a microbiological and  
80 metabolomic analysis of its metabolic potential as a nutritional mutualist. Finally, we modified an  
81 established *in vitro* larval rearing protocol to measure the effect of *B. apis* dietary  
82 supplementation on the growth of larvae experiencing nutritional stress. Our results strongly  
83 support the hypothesis that *B. apis* is a nutritional symbiont of honey bee larvae.

## 85 Results and Discussion

### 86 Only *Bombella apis* persists in honey bee larval diet.

87 The honey bee larval diet comprises nectar, pollen, and royal jelly (6, 49). Royal jelly has long  
88 been known to possess potent antimicrobial properties, due to its acidity, viscosity, and the  
89 presence of antimicrobial peptides (50–52). Therefore, any bacterial mutualist exposed to the  
90 larval diet must be capable of tolerating this strongly antimicrobial environment. The honey bee  
91 larval microbiome has been characterized using 16S rRNA gene amplicons and comprises a  
92 limited number of bacterial taxa, predominately *Bombella apis*, *Lactobacillus kunkeei*, and  
93 *Fructobacillus fructosus* (plus uncharacterized *Lactobacillus* spp and *Fructobacillus* spp, and  
94 occasionally *Bifidobacterium* spp) (47, 53). To assess the ability of larvae-associated microbes to  
95 survive in royal jelly, we subjected bacterial strains to media containing a gradient of royal jelly  
96 (up to 50%) for 24 hours and determined strain persistence by counting resulting CFUs (Figure  
97 1A). The 50% royal jelly treatment recapitulates the highest proportion of royal jelly used in  
98 standard *in vitro* larval rearing diets (54, 55). The bacterial media used here and in following  
99 assays was developed by our lab for the rapid growth of larvae-associated strains and is based  
100 on the components of the honey bee larval diet (Bacto-Schmehl (BS), see Methods). All five  
101 strains of *Bombella apis* assayed were able to survive at all levels of royal jelly (Figure 1B). Some  
102 *B. apis* strains show a dip in the number of CFUs recovered between the media control and  
103 lowest concentration of royal jelly, indicating a degree of susceptibility to royal jelly inhibition  
104 (Figure 1C). CFUs varied between strains, with B8 and C6 displaying the least reduction when  
105 royal jelly is first introduced. A29 and MRM1T show the greatest sensitivity to royal jelly  
106 addition, each exhibiting a 10-fold reduction in CFUs compared to media alone. In contrast,  
107 *Lactobacillus kunkeei* AJP1 and *Fructobacillus fructosus* AJP3 were highly sensitive to royal jelly  
108 addition. *L. kunkeei* AJP1 displayed a dose-dependent decline in the number of CFUs recovered  
109 at each increase in royal jelly in the media, with near total inhibition at 50%. *F. fructosus* AJP3  
110 was unable to survive in any concentration of royal jelly beyond 10%. Overall, *B. apis* survival  
111 when challenged with royal jelly appears robust compared to other bacteria often identified as  
112 larvae-associated.

113 All bacteria assayed here are associated with the larval diet niche from previous sequencing  
114 studies, but we do not know if the DNA sequenced arose from living cells or was ephemerally  
115 maintained from cells lysed in the diet (47, 53). Our findings suggest that *Bombella apis* and, to  
116 a lesser degree, *Lactobacillus kunkeei* are living in this niche, and other frequently sequenced  
117 bacteria such as *Fructobacillus fructosus* are likely not. This is in line with previous genomic  
118 evidence establishing *B. apis* as a honey bee-associated bacterium (56). Hosts who associate  
119 with horizontally acquired symbionts require a means of winnowing beneficial partners from  
120 environmental microbes, a phenomenon that has been predominantly studied in the context of  
121 selectivity of host tissues (57–60). However, honey bees mature in a built environment which  
122 can itself exert selective pressures on bacterial assemblages. In the case of the larval niche, it  
123 appears that the presence of royal jelly selects strongly for *Bombella apis* strains to associate  
124 with growing larvae.

125

126 *B. apis* can produce all essential amino acids

127 As *B. apis* can persist in larval diet, we reasoned that it may be able to metabolically transform  
128 it. To first consider how *B. apis* may modify the host diet, we used tools provided by the DOE's  
129 (IMG/M) website to explore the metabolic capabilities of a sequenced strain, A29. The *B. apis*  
130 genomes encode the complete biosynthetic pathways required to produce all canonically  
131 essential amino acids (Figure 2A). We then extended this result to all sequenced *B. apis* strains  
132 using an analysis of conserved orthologs; all sequenced *B. apis* strains retain the ability to  
133 synthesize all amino acids (Supplementary Table 1).

134 To validate the genomic prediction that *B. apis* A29 can synthesize all essential amino acids, we  
135 created two minimal media (see methods) containing either all amino acids, or nonessential  
136 amino acids only. When provided only nonessential amino acids, *B. apis* A29 showed no growth  
137 defects after 48 hours, arriving at a final OD600 similar to that observed when provided all  
138 essential amino acids in minimal media, confirming that *B. apis* A29 can synthesize all essential  
139 amino acids from nonessential precursors (Figure 2B).

140 Nutritional symbiosis is most studied in the context of endosymbionts which are often ancient  
141 and obligate, resulting in loss of bacterial genes essential for life outside the host (26, 61–64).  
142 These losses often result in metabolic dependencies between host and symbiont, or multiple  
143 symbionts (11, 12, 65–69). However, in the case of *B. apis*, its position in the larval diet niche  
144 appears to maintain selective pressure on free living traits such as complete biosynthetic  
145 pathways for the generation of all amino acids (Figure 2A). Since *B. apis* is associated with  
146 multiple in-hive environments such as the nurse crop, queen gut, and nectar, it is likely that *B.*  
147 *apis* is faced with a variety of nutritional environments that necessitate metabolic autonomy.

148

149 *B. apis* secretes lysine in the larval diet

150 After validating our metabolic predictions in culture, we next assessed how the presence of *B.*  
151 *apis* may modify the nutritional composition of the larval diet itself. We reasoned that if *B. apis*  
152 were to be supplementing the host with amino acids, it should encode amino acid transporters.  
153 Indeed, the *B. apis* A29 genome encodes a LysE/ArgO cationic amino acid transporter (Figure  
154 2A). We therefore used a gene gain/loss analysis across the phylogeny of all sequenced *B. apis*  
155 strains and related microbes to identify branches at which amino acid transporters may have  
156 been acquired (Figure 3). In the process of performing this analysis, using a larger number of  
157 strains, we recapitulated prior results, identifying the acquisition of gluconolactonase, of  
158 CRISPR-Cas cassettes, and of several restriction modification systems by *Bombella*  
159 (Supplementary Table 2) (56). As we expected, we also identified three orthologs, each  
160 encoding putative cationic amino acid transporters, present in *Bombella apis* genomes. The first  
161 was present in the progenitor to all these acetic acid microbes (LysE/ArgO). The second was  
162 acquired by the ancestor to *Saccharibacter* and *Bombella*. And the third acquired by the  
163 ancestor of the *Bombella* clade (ASO19\_03265, WP\_154981532 and WP\_086431440 in the *B.*  
164 *apis* A29 genome [LMYH01000007.1](#); Supplementary Table 3). This result suggests that in the

165 evolution of *Bombella* in honey bee association, the transport of cationic amino acids, such as  
166 lysine, was an important trait.

167 We next aimed to experimentally confirm the secretion of lysine by *B. apis* in larval diet. Due to  
168 the logistical challenge of acquiring large quantities of natural larval diet, we relied on the  
169 synthetic larval diet used in the process of *in vitro* rearing of honey bee larvae, developed by  
170 Schmehl et al, 2011. This synthetic larval diet is compositionally like natural larval diet and is  
171 sufficient to rear honey bee larvae to adulthood (55). To determine how *B. apis* A29 modifies  
172 the larval diet, we, performed gas chromatography-mass spectrometry (GC-MS) on samples of  
173 diet incubated with either live or heat-killed *B. apis* A29. We selected this strain because its  
174 genome has been previously sequenced, and it grows reliably under laboratory conditions. The  
175 heat-killed control allowed us to subtract the nutritional contribution of raw bacterial biomass  
176 provided by lysed cells and focus on the output of *B. apis* A29's active metabolism in the larval  
177 diet. Strikingly, larval diet supplemented with live *B. apis* A29 contains significantly higher levels  
178 of total essential amino acids (Figure 4A, one-way ANOVA, Tukey HSD,  $p=0.0006858$ ).  
179 Conversely, nonessential amino acids are significantly lower when live *B. apis* A29 is present  
180 (Figure 4A, one-way ANOVA, Tukey HSD,  $p=0.0298679$ ), while total TCA cycle intermediates are  
181 not significantly affected (Supplementary Figure 2, one-way ANOVA, Tukey HSD,  $p=0.6313555$ ).  
182 Though not statistically significant, the TCA cycle intermediate citrate was increased by the  
183 presence of live *B. apis* (Supplemental Figure 3, Mann-Whitney U test, Bonferroni correction,  $p=$   
184  $0.115346$ ). These patterns suggest an upcycling by *B. apis* of nonessential dietary amino acids  
185 into essential amino acids, which are then taken up by the host. The significant increase in total  
186 essential amino acids is driven largely by a more than twofold increase in lysine (Figure 4B, one-  
187 way ANOVA, Tukey HSD,  $p<0.0000001$ ). Essential amino acids significantly decreased by live *B.*  
188 *apis* include methionine and threonine (one-way ANOVA, Tukey HSD,  $p<0.000001$  and  $p=$   
189  $0.0006436$ , respectively)), both of which rely on the same metabolic precursors as lysine.  
190 Nonessential amino acids significantly decreased by *B. apis* were glutamate and serine  
191 (Supplementary Figure 1, one-way ANOVA, Tukey HSD,  $p=0.001591$  and  $p=0.0110176$ ,  
192 respectively). Though not statistically significant, proline was the only nonessential amino acid  
193 increased by the presence of live *B. apis* (Supplemental Figure 1, one-way ANOVA, Tukey HSD,  
194  $p=0.0866928$ ). Together these data reveal that *B. apis* can dramatically impact the amino acid  
195 content of the honey bee larval diet, largely by increasing dietary lysine.

196 The ability of *B. apis* to not only survive, but meaningfully modify the honey bee larval diet  
197 strongly implicates this bacterium as a nutritional mutualist of honey bee larvae. Insects who  
198 feed on nutritionally challenging diets must often rely on bacterial partners to supplement  
199 missing nutrients (10–13). Many of the best documented examples of bacterial  
200 supplementation involve insects gaining essential amino acids from intracellular symbionts (10,  
201 11, 39, 65, 70). *B. apis* A29 appears to be shunting its metabolic energies into production of the  
202 essential amino acid lysine, which may be particularly valuable to developing larvae. Lysine  
203 appears to play an important role in other holometabolous symbioses; bacterial lysine synthesis  
204 and export is crucial for whitefly reproduction, and lysine synthesis is maintained in two  
205 *Campotonus* ant symbionts despite genome-wide erosion of central metabolic genes (71, 72).  
206 An essential role of lysine on adult honey bee mass was revealed by de Groot in a 1952 study

207 where the author measured adult mass after withholding individual amino acids from the adult  
208 diet. Adult bees deprived of lysine suffered greatly reduced mass relative to those on complete  
209 diets (36). Further, many commercial crops which rely on honey bee pollination services only  
210 barely meet an adult bee's minimum lysine requirements (35). Importantly, both studies  
211 focused on adult bees, yet we know that the nutritional demands of larvae are more dire (6–8).  
212 It is easy, therefore, to imagine a scenario where a honey bee colony must rely on mutualistic  
213 bacteria such as *B. apis* to fill in the nutritional gaps in the larval diet.

214

### 215 *B. apis* bolsters honey bee larval growth under nutrient scarcity

216 To assess whether the observed metabolic modifications of the larval diet by *B. apis* translate to  
217 ecologically meaningful outcomes for honey bee larvae, we conducted an *in vitro* rearing  
218 experiment testing the impact of dietary *B. apis* under different diet conditions. Larvae were  
219 grafted at 1<sup>st</sup> instar from naturally mated colonies into sterile multiwell plates containing axenic  
220 *in vitro* rearing diet. This approach allowed us to modify the microbial content of the diet as  
221 well as the nutrition the larvae received; however we are unable to sterilize field-collected  
222 larvae to create axenic individuals. We raised larvae under sterile conditions on either synthetic  
223 diet (nutrient-rich) or diet that had been diluted with water by 25% (nutrient-poor) and  
224 supplemented them daily with either live *B. apis* A29 or sterile PBS alone, creating four  
225 different treatment conditions. Larvae were individually weighed at the end of their larval  
226 period, just before pupation and after evacuation of the larval gut. In this experiment, larvae  
227 reached masses between 50.9 mg and 158.5 mg (mean 133.4 mg, standard deviation 22.4 mg),  
228 well within range of published masses for honey bee 5<sup>th</sup> instar larvae (73, 74). As expected,  
229 dropping the nutritional content of the larval diet by 25% resulted in an average weight drop of  
230 17% in PBS-supplemented control larvae. Therefore, our nutrient limitation treatment did  
231 translate to phenotypic differences in the 5th instar larvae. Larvae absent their symbiont but  
232 subjected to nutrient-poor conditions were significantly smaller than those in nutrient-rich  
233 conditions (Figure 5, Mann-Whitney U test, Bonferroni correction,  $p=0.013086$ ). In contrast,  
234 larvae in the nutrient-poor condition supplemented with *B. apis* A29 were able to reach the  
235 same masses as those in nutrient-rich conditions (Figure 5, Mann-Whitney U test, Bonferroni  
236 correction,  $p=0.179$ ). We also noticed that the variance in the masses reached by larvae in the  
237 nutrient-poor condition absent their symbiont was significantly greater than those in the  
238 nutrient poor condition but given *B. apis* (Figure 5, Levene's Test of Equal Variance, Bonferroni  
239 correction,  $p=0.017442$ ) – from 53.71 in the *B. apis*-supplemented group to 1000.25 in the un-  
240 supplemented group. PBS control larvae in nutrient-limited conditions reached masses as low  
241 as 50.9 mg, while those supplemented with *B. apis* under the same nutrient-limited conditions  
242 reached more than twice the mass (114 mg for the smallest individual). While there was no  
243 statistically significant difference between PBS and *B. apis*-supplemented larvae in the nutrient  
244 poor condition (Figure 5, Mann-Whitney U test, Bonferroni correction,  $p=1$ ), on average,  
245 nutrient-poor PBS control larvae were 7% smaller than those supplemented with *B. apis*.  
246 Overall, these results indicate that *B. apis* can rescue growth under nutrient limitation. Though  
247 nutrient-limited larvae in the PBS group were smaller at prepupation, developmental time was  
248 the same between all groups, as indicated by the purging of gut contents on the fifth day of

249 feeding. Coupled with our metabolomic findings, these data showing a growth buffering  
250 phenotype of larval bees experiencing poor nutrition indicate a role for *B. apis* as a nutritional  
251 mutualist of honey bee larvae.

## 252 Conclusions and future work

253 *Bombella apis* is the only honey bee larvae associated microbe that can survive in royal jelly. It  
254 synthesizes all essential amino acids and secretes lysine in larval diet. The presence of *B. apis*  
255 bolsters honey bee larval mass during nutrient scarcity, which can have dramatic downstream  
256 consequences for honey bee colony health. All these data point to the importance of *B. apis* in  
257 a colony. Importantly, however, we have not linked the lysine secretion directly to honey bee  
258 nutritional supplementation. Future work will focus on genetic modification of *B. apis* to  
259 squarely implicate the cationic amino acid transporters and/or amino acid biosynthetic  
260 pathways to honey bee nutrition. Also, although we have performed a comparative genomic  
261 analysis on multiple strains and determined that all strains are capable of synthesizing and  
262 secreting lysine, it remains to be determined whether there is variation in their nutritional  
263 bolstering. It is conceivable, that some strains are better mutualists than others, and the link  
264 between genetic and phenotypic diversity in *B. apis* is an active area of research in the lab.  
265 Indeed, based on our data (Figure 1), we might suspect that different strains are better able to  
266 survive and supplement larvae in the royal jelly diet. Additionally, genetic differences in the  
267 honey bee larvae in our experiments may account for some of the variance we observed in our  
268 experiments, although we were careful to randomize our sampling of larvae across treatments.  
269 The interaction between honey bee genetics and the microbiome is only starting to be explored  
270 and it would be a benefit in future experiments to at least control for genetic variation in a  
271 colony by using single drone inseminated queens. Finally, our experiments were performed on  
272 *B. apis* alone and it is likely that *Lactobacillus kunkeei* also plays some role in larval  
273 development given that 1) it is routinely isolated from larval niches and honey bee hive  
274 environments and 2) it can survive in the presence of some royal jelly. Understanding the  
275 interaction between *B. apis* and *L. kunkeei* will be important to understanding the role that  
276 these microbes play in honey bee larval development and nutritional supplementation.

277

## 278 **Methods**

### 279 Culturing bacteria

280 *Bombella apis* A29 was grown at 34°C, ambient oxygen, shaking at 250 rpm, in Bacto-Schmehl  
281 (BS) liquid media. BS growth media is derived from the larval diet outlined in Schmehl et al.,  
282 2011 conceived for growth of the honey bee larvae and is described in the following section.  
283 The designation BactoSchmehl is used with the written permission of Dr. Daniel Schmehl.

### 284 Bacto-Schmehl (BS) Media

- 285 - 5% w/v D-Glucose
- 286 - 5% w/v D-Fructose
- 287 - 1% w/v Yeast Extract

- 288 - 4% v/v 5X Sigma M9 Salt Solution (catalog #M9956)
- 289 - 0.2% v/v Cation solution (1% [v/v]; 100 mM MgSO<sub>4</sub> and 10 mM CaCl<sub>2</sub> in diH<sub>2</sub>O)
- 290 - 84.8% Milli-Q H<sub>2</sub>O

291 Cation solution must be autoclaved separate from the M9 salt solution. BS media final pH 6.5.

#### 292 Minimal Bacto-Schmehl Media (mBS)

- 293 - D-Glucose
- 294 - D-Fructose
- 295 - 5X Sigma M9 Salt Solution (catalog #M9956)
- 296 - Cation solution (1% [v/v]; 100 mM MgSO<sub>4</sub> and 10 mM CaCl<sub>2</sub> in diH<sub>2</sub>O)
- 297 - 1X Sigma MEM Vitamin Solution (catalog #M6895)
- 298 - 1X Sigma MEM Amino Acids solution (catalog #M5550) or 1X Sigma Non-essential Amino
- 299 Acid Solution (catalog #M7145)
- 300 - Milli-Q H<sub>2</sub>O

#### 301 Bacterial growth in honey bee larval diet

302 Overnight cultures of each bacterial strain were grown in BS broth (*Bombella apis* A29, *B. apis*  
303 B8, *B. apis* C6, *B. apis* SME1, *B. apis* MRM1T, *Lactobacillus kunkeei* AJP1, and *Fructobacillus*  
304 *fructosus* AJP3). Cultures were washed (cells spun down in microcentrifuge tubes and  
305 resuspended in sterile PBS) twice in sterile 1X PBS, then normalized to 10<sup>7</sup> CFU/ml. 50 ul of each  
306 bacterial suspension was added to 500 ul of BS media with an increasing proportion of  
307 commercial royal jelly up to 50%, in triplicate. After 24 hours incubating at 34°C, samples were  
308 serially diluted and plated on BS agar, in triplicate. CFUs were counted to determine numbers of  
309 viable cells.

310

#### 311 Comparative genomic content analyses, identification of orthologs, and gain/loss analysis

312 To define orthologs, protein sequences were extracted from NCBI annotated sequence files for  
313 the *Acetobacteraceae* clade rooted on *Gluconobacter* (Figure 3). Reciprocal best blast hits were  
314 calculated, and genes clustered into ortholog groups using complete linkage. Conserved core  
315 orthologs were used to generate the species tree for these genera and this was used, in  
316 conjunction with GLOOME (75) to infer branch-specific gene gain/loss events (Supplementary  
317 Table 2). To define presence/absence of amino acid biosynthesis genes (Supplementary Table  
318 1), ortholog representatives were run against GapMind (76) to find amino acid biosynthetic  
319 genes in the proteomes. Additionally, annotation based on NCBI's PGAP was used, in  
320 conjunction with DOE's IMG/M to confirm the putative function of orthologous groups of  
321 genes.

#### 322 Minimal media assay

323 An overnight culture of *B. apis* A29 was grown in BS broth, then washed in sterile 1X PBS before  
324 inoculating mBS media containing either a complete amino acid solution or a non-essential  
325 amino acid solution (see Methods). Cultures were diluted 1:100 in mBS and incubated at 34°C



326 for 48 hours. Optical density (OD600) was measured using a spectrophotometer at the start of  
327 the experiment and at 48 hours.

328

### 329 Larval collection and rearing

330 All larvae were collected from hives at the IURTP Bayles Road field site in October 2019. To  
331 minimize any effects of manipulation of the bee larvae and of genetic differences between  
332 colonies, all larvae were evenly distributed between treatments with respect to colony of origin  
333 and order of collection.

334 First instar larvae were grafted from comb using a plastic grafting tool and were deposited into  
335 plastic queen cups in 48-well plates. Grafting and rearing protocols were conducted according  
336 to the Schmehl et al. 2011 protocol with several deviations noted here. Each larva was grafted  
337 into 10 ul UV-sterilized larval Diet A (Schmehl et al., 2011), at the field site over the course of  
338 two hours. The larvae were transported back to the laboratory and incubated in darkness at  
339 34°C and 90% RH. After overnight incubation, the larvae that did not survive grafting were  
340 removed and the remaining larvae were divided into experimental groups.

341 All larvae were fed according to the diet recipes of Schmehl et al., 2011. Larval diet was made  
342 no more than 48 hours in advance of each feeding. All diet was UV-sterilized for 20 minutes to  
343 remove any potential bacterial contamination. Diet was refrigerated at 4°C between feedings  
344 and warmed to 34°C prior to each feeding. Larval diet was dispensed to individual larvae under  
345 a laminar flow hood using sterile pipettes. Larvae were fed mid-afternoon across all  
346 experiments.

347 The larval feeding and bacterial supplementation timeline is outlined in the table below:

|       |                                                                                       |
|-------|---------------------------------------------------------------------------------------|
| Day 0 | Larvae grafted from field                                                             |
| Day 1 | 10 ul Diet A                                                                          |
| Day 2 | 20 ul Diet B, 5 ul bacterial cell suspension                                          |
| Day 3 | 30 ul Diet C, 5 ul bacterial cell suspension                                          |
| Day 4 | 40 ul Diet C, 5 ul bacterial cell suspension                                          |
| Day 5 | 50 ul Diet C, 5 ul bacterial cell suspension, diet samples collected for metabolomics |
| Day 6 | Prepupal masses recorded                                                              |

348

349 In all supplementation experiments, high-diet larvae received undiluted larval diet according to  
350 Schmehl et al., 2011 recipes. Low-diet larvae received larval diet from the same batches,  
351 divided and diluted by 25% using sterile deionized water. Each batch of diet was divided and  
352 diluted prior to UV-sterilization.

353 On the sixth day following larval grafting, larvae had consumed all remaining diet and defecated  
354 in their cells. Each larva was then removed from its cell and individually weighed. Residual diet  
355 and excrement were removed from the surface of each larva using a modified plastic grafting

356 tool prior to weighing. Any larvae that were accidentally punctured during the weighing process  
357 were not weighed.

358

### 359 Bacterial supplementation of larval diet

360 An overnight culture of *B. apis* A29 was washed twice to remove excess media, then  
361 resuspended in sterile PBS. Optical density (OD) was measured using a spectrophotometer to  
362 confirm adherence to known OD/CFU. Prior to larval feeding, bacterial suspensions were  
363 normalized to 10<sup>4</sup> CFU/ml using PBS. For experiments involving heat-killed controls, this  
364 normalized solution was then divided, and half was subjected to boiling for 10 minutes. 5 ul of  
365 bacterial suspensions or PBS was pipetted into each queen cup containing a single larva.  
366 Bacterial suspensions were given immediately after daily feeding. All feeding and  
367 supplementation was performed using sterile technique under a laminar flow hood. Larval  
368 masses were compared in R using pairwise Mann-Whitney U-tests, then Bonferroni corrected  
369 for multiple comparisons

### 370 Metabolomic analysis

371 On the fifth day following larval grafting, samples were taken from the larval diet of *in vitro*  
372 reared larvae for metabolomic analysis. 8 hours after diet administration and bacterial  
373 supplementation, 3 ul of diet was removed from each larval cell. Samples were combined based  
374 on treatment, yielding 12 ul samples representing diet from four individual larvae. These 12 ul  
375 samples were immediately flash-frozen in liquid nitrogen and stored at -80°C before GC-MS.  
376 Samples were randomized prior to GC-MS to control for variation between individual GC-MS  
377 runs.

378 GC-MS analysis of larval diet samples were conducted using a modified version of a previously  
379 described method (77). Briefly, 12 mL of larval diet was dissolved in 800 mL of prechilled (-20  
380 °C) 90% methanol containing 2 µg/mL succinic-d4 acid. The sample was incubated at -20°C for 1  
381 hour and centrifuged at 20,000 x g for 5 minutes at 4°C. 600 ml of the supernatant was  
382 transferred into a new 1.5 mL microcentrifuge tube and dried overnight in a vacuum centrifuge.  
383 Dried samples were resuspended in 40 µL of 40 mg/mL methoxylamine hydrochloride (MOX)  
384 dissolved in anhydrous pyridine and incubated at 37°C for 1 hour in a thermal mixer shaking at  
385 600 rpm. Samples were then centrifuged for 5 minutes at 20,000 x g and 25 µL of supernatant  
386 was transferred into an autosampler vial with a 250 µL deactivated glass microvolume insert  
387 (Agilent 5181-8872). 40 µL of N-methyl-N-trimethylsilyltrifluoroacetamide (MSTFA) containing  
388 1% TMCS was then added to the sample, at which point the autosampler vial was capped and  
389 placed at 37°C for 1 hour with shaking (250 rpm).

390 1 µL of sample was injected an Agilent GC7890-5977 mass spectrometer equipped with a  
391 Gerstel MPS autosampler. Samples were injected with a 10:1 split ratio and an inlet  
392 temperature of 300°C. Chromatographic separation was achieved using a 0.25 mm x 30 m  
393 Agilent HP-5ms Ultra Insert GC column with a helium carrier gas flow rate of 1.98 mL/min. The  
394 GC temperature gradient was as follows: (1) Hold at 95°C for 1 min. (2) Increase temperature to  
395 110°C with a 40°C/min ramp. Hold 2 min. (3) Increase temperature to 250°C with a 25°C/min

396 ramp. (4) Increase temperature to 330°C with a 25°C/min ramp. Hold for 4 minutes. Extraction  
397 and GC-MS was performed by the Indiana University Mass Spectrometry Facility. Metabolite  
398 concentrations were compared in R using pairwise Mann-Whitney U-tests, then Bonferroni  
399 corrected for multiple comparisons, or were normalized using Box Cox transformation prior to  
400 one-way ANOVA and Tukey HSD correction.

401

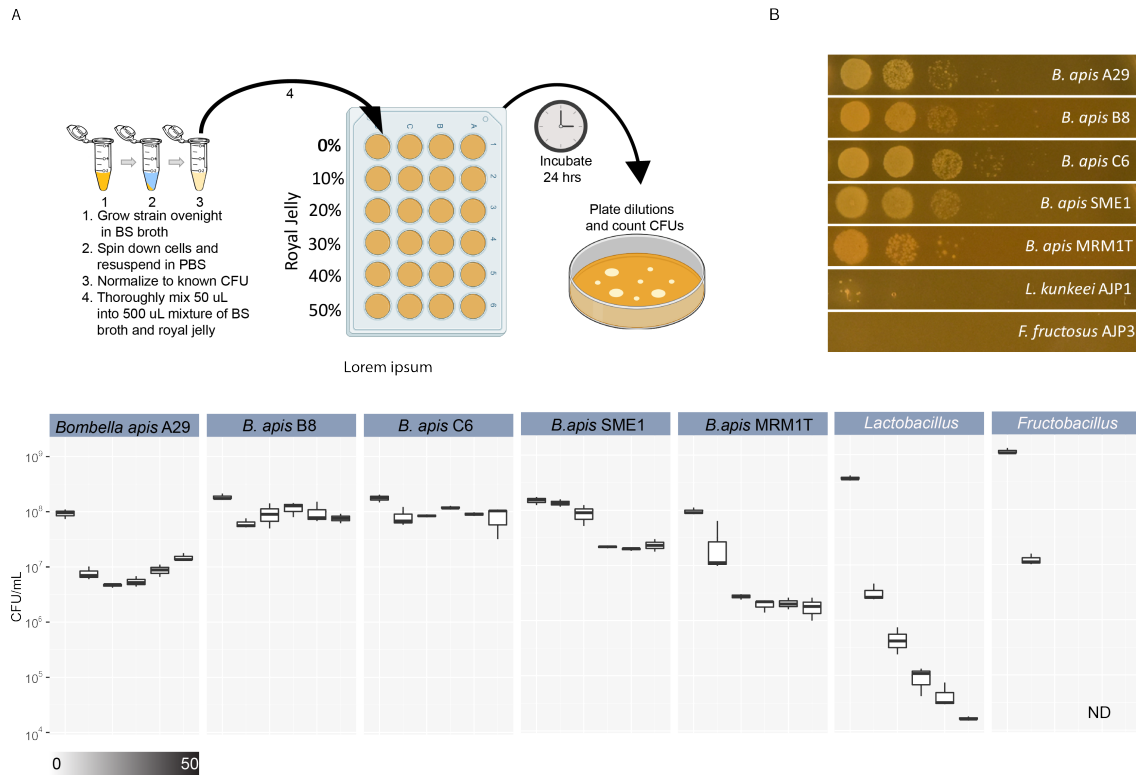

402

403

404 Figure 1 – Only *Bombella apis* can tolerate the antimicrobial properties of royal jelly. **A.** The  
405 survival of a panel of larvae-associated bacteria in the presence of royal jelly was assessed by  
406 subjecting each to media containing a gradient of royal jelly from 0-50%. Strains were incubated  
407 overnight and plated on agar media to count CFUs. **B.** Representative images of the spot-  
408 dilution plates used to count CFUs after incubation in 50% royal jelly. **C.** Boxplots containing the  
409 total counts of CFUs resulting from each strain across all concentrations of royal jelly. Each  
410 concentration of all strains was calculated across three biological replicates.

411

412

413

414

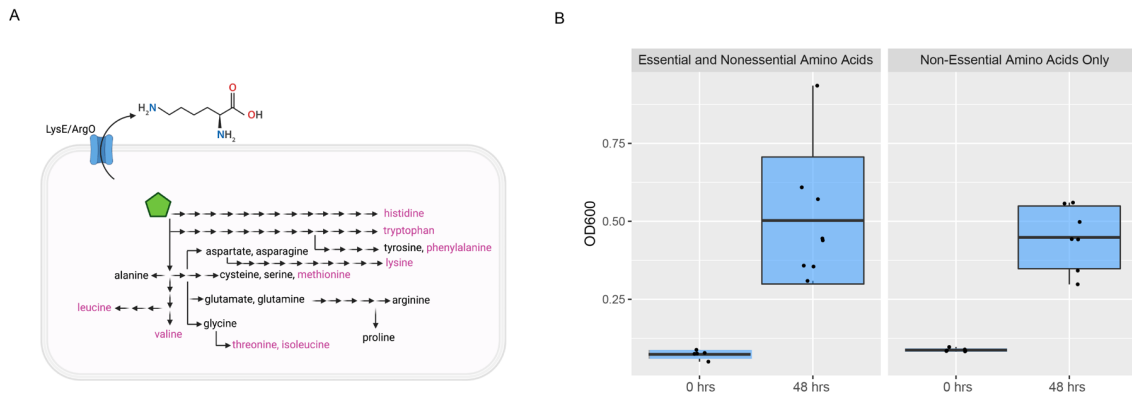

415

416

417 Figure 2 – *B. apis* A29 can produce all essential amino acids. **A.** Schematic diagram depicting the  
418 amino acid metabolic potential of *B. apis* A29, plus a putative lysine/arginine exporter. Arrows  
419 represent enzymatic steps in biosynthetic pathways. Each amino acid that can be synthesized  
420 by *B. apis* A29 is positioned at the end of a pathway, with essential amino acids labeled in pink.  
421 **B.** Boxplots representing the optical density achieved by *B. apis* A29 after incubating for 48  
422 hours in media containing either all 20 amino acids required for protein synthesis, or only non-  
423 essential amino acids. Each group contained at least 5 biological replicates.

424

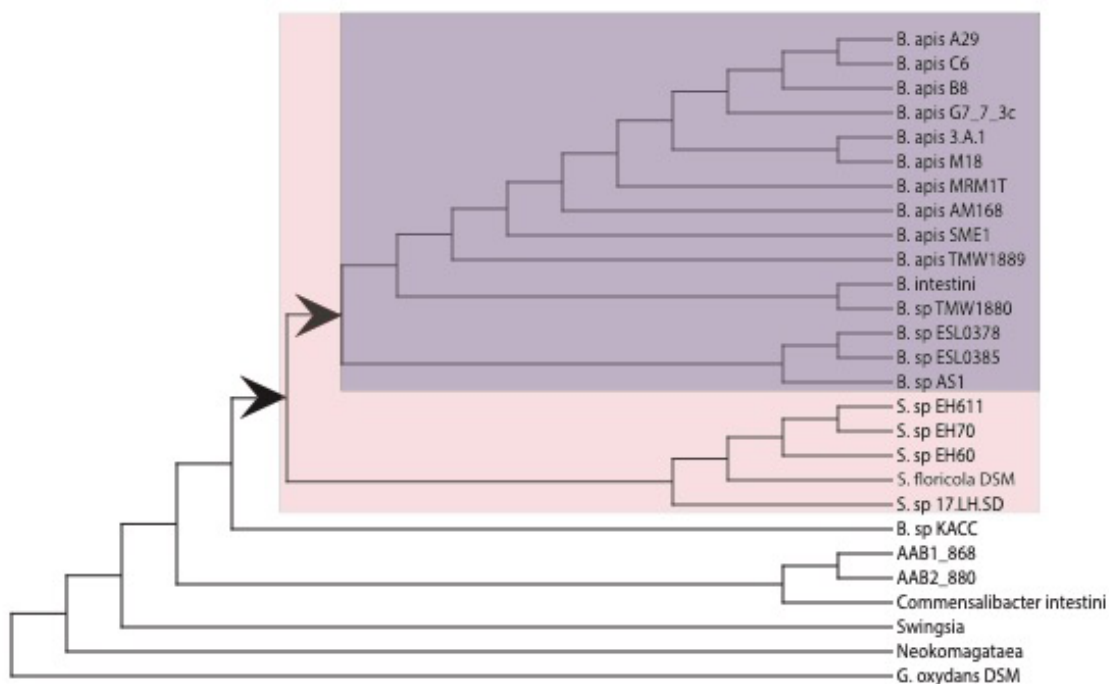

425  
426 Figure 3 – *Bombella apis* strains encode three amino acid transporters, having acquired two  
427 cationic transporters in their evolutionary history. Phylogenetic tree generated from conserved  
428 core orthologs across the included strains (accessions found in Supplementary Table 1).  
429 Predicted acquisitions of cationic amino acid transporters indicated at arrowheads.

430

431

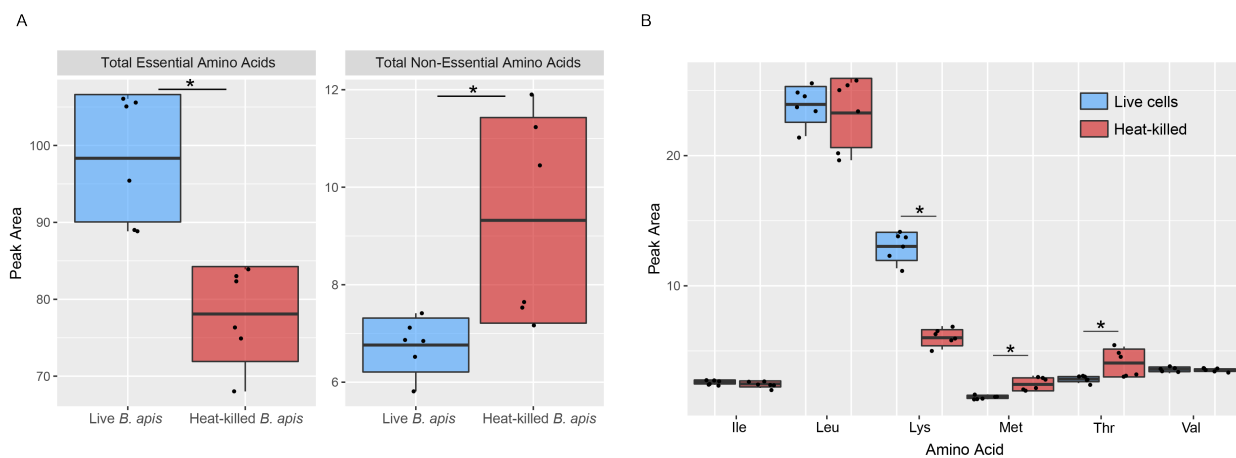

432  
433 Figure 4 – *B. apis* A29 increases the essential amino acid lysine in the honey bee larval diet. **A.**  
434 Boxplots showing the total peak areas of essential and non-essential amino acids in synthetic

435 larval diet after incubating with either live (blue) or heat-killed (red) *B. apis* A29. Larval diet  
436 incubated with live *B. apis* A29 contained significantly higher total essential amino acids  
437 ( $p=0.0006858$ ) and significantly lower total non-essential amino acids ( $p=0.0298679$ ). **B.**  
438 Boxplots showing the peak areas of individual essential amino acids in synthetic larval diet after  
439 incubating with either live (blue) or heat-killed (red) *B. apis* A29. Live *B. apis* A29 results in  
440 significantly higher dietary lysine ( $p<0.0000001$ ) and significantly lower methionine ( $p<$   
441  $0.000001$ ) and threonine ( $p= 0.0006436$ ). Significant differences in peak area were determined  
442 using one-way ANOVA and corrected using Tukey HSD. Prior to ANOVA, data was normalized  
443 using Box Cox transformation.

444

445

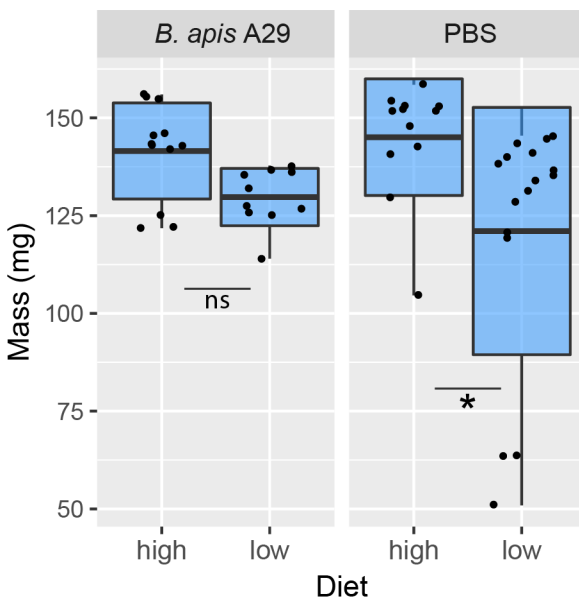

446

447

448 Figure 5 – *B. apis* A29 buffers larval mass against poor diet. Boxplot showing the masses of  
449 individual larvae after receiving either synthetic larval diet or diet diluted 25% with water, plus  
450 either live *B. apis* A29 or sterile phosphate buffered saline (PBS). Larvae given diet  
451 supplemented daily with *B. apis* A29 show no significant difference in mass between full or  
452 diluted diet ( $p= 0.19266$ ). Among larvae given PBS only, those receiving diluted diet are  
453 significantly smaller than those receiving undiluted diet ( $p= 0.013086$ ). Significant differences in  
454 mass were determined using the Mann-Whitney U test with Bonferroni correction.

455

456

457

458

- 459 1. R. Brodschneider, *et al.*, Multi-country loss rates of honey bee colonies during winter  
460 2016/2017 from the COLOSS survey. *J. Apic. Res.* **57**, 452–457 (2018).
- 461 2. K. Kulhanek, *et al.*, Encuesta nacional 2015–2016 sobre pérdidas anuales de colonias de  
462 la abeja de la miel manejada en los EE.UU. *J. Apic. Res.* **56**, 328–340 (2017).
- 463 3. D. Goulson, E. Nicholls, C. Botías, E. L. Rotheray, Bee declines driven by combined Stress  
464 from parasites, pesticides, and lack of flowers. *Science (80-. )*. **347** (2015).
- 465 4. A. G. Dolezal, *et al.*, Interacting stressors matter: Diet quality and virus infection in  
466 honeybee health. *R. Soc. Open Sci.* **6** (2019).
- 467 5. A. G. Dolezal, A. L. Toth, Feedbacks between nutrition and disease in honey bee health.  
468 *Curr. Opin. Insect Sci.* **26**, 114–119 (2018).
- 469 6. R. Brodschneider, K. Crailsheim, Nutrition and health in honey bees. *Apidologie* **41**, 278–  
470 294 (2010).
- 471 7. H. N. Scofield, H. R. Mattila, Honey bee workers that are pollen stressed as larvae  
472 become poor foragers and waggle dancers as adults. *PLoS One* **10**, e0121731 (2015).
- 473 8. I. Keller, P. Fluri, A. Imdorf, Pollen nutrition and colony development in honey bees - Part  
474 II. *Bee World* **86**, 27–34 (2005).
- 475 9. M. McFall-Ngai, *et al.*, Animals in a bacterial world, a new imperative for the life sciences.  
476 *Proc. Natl. Acad. Sci. U. S. A.* **110**, 3229–3236 (2013).
- 477 10. E. Akman Gündüz, A. E. Douglas, Symbiotic bacteria enable insect to use a nutritionally  
478 inadequate diet. *Proc. R. Soc. B Biol. Sci.* **276**, 987–991 (2009).
- 479 11. D. Wu, *et al.*, Metabolic complementarity and genomics of the dual bacterial symbiosis of  
480 sharpshooters. *PLoS Biol.* **4**, 1079–1092 (2006).
- 481 12. X. Bing, *et al.*, Unravelling the relationship between the tsetse fly and its obligate  
482 symbiont *Wigglesworthia*: Transcriptomic and metabolomic landscapes reveal highly  
483 integrated physiological networks. *Proc. R. Soc. B Biol. Sci.* **284** (2017).
- 484 13. H. Itoh, *et al.*, Host–symbiont specificity determined by microbe–microbe competition in  
485 an insect gut. *Proc. Natl. Acad. Sci.*, 201912397 (2019).
- 486 14. L. V. Flórez, *et al.*, An antifungal polyketide associated with horizontally acquired genes  
487 supports symbiont-mediated defense in *Lagria villosa* beetles. *Nat. Commun.* **9**, 2478  
488 (2018).
- 489 15. M. Kaltenpoth, W. Göttler, G. Herzner, E. Strohm, Symbiotic bacteria protect wasp larvae  
490 from fungal infestation. *Curr. Biol.* **15**, 475–479 (2005).
- 491 16. K. M. Oliver, P. H. Degnan, M. S. Hunter, N. A. Moran, Bacteriophages encode factors  
492 required for protection in a symbiotic mutualism. *Science (80-. )*. **325**, 992–994 (2009).

- 493 17. S. C. Shin, *et al.*, *Drosophila* microbiome modulates host developmental and metabolic  
494 homeostasis via insulin signaling. *Science (80-. )*. **334**, 670–674 (2011).
- 495 18. F. Dedeine, *et al.*, Removing symbiotic *Wolbachia* bacteria specifically inhibits oogenesis  
496 in a parasitic wasp. *Proc. Natl. Acad. Sci. U. S. A.* (2001)  
497 <https://doi.org/10.1073/pnas.101304298>.
- 498 19. T. A. Koropatnick, *et al.*, Microbial factor-mediated development in a host-bacterial  
499 mutualism. *Science (80-. )*. **306**, 1186–1188 (2004).
- 500 20. C. K. Chun, *et al.*, Effects of colonization, luminescence, and autoinducer on host  
501 transcription during development of the squid-vibrio association. *Proc. Natl. Acad. Sci. U.*  
502 *S. A.* **105**, 11323–8 (2008).
- 503 21. N. J. Shikuma, *et al.*, Marine tubeworm metamorphosis induced by arrays of bacterial  
504 phage tail-like structures. *Science (80-. )*. **343**, 529–533 (2014).
- 505 22. E. Akman Gündüz, A. E. Douglas, Symbiotic bacteria enable insect to use a nutritionally  
506 inadequate diet. *Proc. R. Soc. B Biol. Sci.* **276**, 987–991 (2009).
- 507 23. C. Freiberg, *et al.*, Molecular basis of symbiosis between *Rhizobium* and legumes. *Nature*  
508 **387**, 394–401 (1997).
- 509 24. C. Médigue, *et al.*, Experimental Evolution of a Plant Pathogen into a Legume Symbiont.  
510 *PLoS Biol.* **8**, e1000280 (2010).
- 511 25. R. M. Brucker, S. R. Bordenstein, Speciation by symbiosis. *Trends Ecol. Evol.* **27**, 443–451  
512 (2012).
- 513 26. N. A. Moran, J. P. McCutcheon, A. Nakabachi, Genomics and evolution of heritable  
514 bacterial symbionts. *Annu. Rev. Genet.* **42**, 165–190 (2008).
- 515 27. N. A. Moran, P. Tran, N. M. Gerardo, Symbiosis and insect diversification: An ancient  
516 symbiont of sap-feeding insects from the bacterial phylum Bacteroidetes. *Appl. Environ.*  
517 *Microbiol.* **71**, 8802–8810 (2005).
- 518 28. F. J. Lee, K. I. Miller, J. B. McKinlay, I. L. G. Newton, Differential carbohydrate utilization  
519 and organic acid production by honey bee symbionts. *FEMS Microbiol. Ecol.* **94** (2018).
- 520 29. F. J. Lee, D. B. Rusch, F. J. Stewart, H. R. Mattila, I. L. G. Newton, Saccharide breakdown  
521 and fermentation by the honey bee gut microbiome. *Environ. Microbiol.* **17**, 796–815  
522 (2015).
- 523 30. H. Zheng, *et al.*, Metabolism of Toxic Sugars by Strains of the Bee Gut Symbiont  
524 *Gilliamella apicola*. *MBio* **7**, e01326-16 (2016).
- 525 31. L. Kešnerová, *et al.*, Disentangling metabolic functions of bacteria in the honey bee gut.  
526 *PLoS Biol.* **15**, e2003467 (2017).
- 527 32. N. Gallai, J. M. Salles, J. Settele, B. E. Vaissière, Economic valuation of the vulnerability of  
528 world agriculture confronted with pollinator decline. *Ecol. Econ.* **68**, 810–821 (2009).



- 529 33. A. L. St Clair, *et al.*, Diversified Farming in a Monoculture Landscape: Effects on Honey  
530 Bee Health and Wild Bee Communities. *Environ. Entomol.* **49**, 753–764 (2020).
- 531 34. D. Naug, Nutritional stress due to habitat loss may explain recent honeybee colony  
532 collapses. *Biol. Conserv.* **142**, 2369–2372 (2009).
- 533 35. E. K. A. Taha, S. Al-Kahtani, R. Taha, Protein content and amino acids composition of bee-  
534 pollens from major floral sources in Al-Ahsa, eastern Saudi Arabia. *Saudi J. Biol. Sci.* **26**,  
535 232–237 (2019).
- 536 36. A. P. de Groot, Amino acid requirements for growth of the honeybee (*Apis mellifica* L.).  
537 *Experientia* **8**, 192–194 (1952).
- 538 37. Z. Huang, Pollen nutrition affects honey bee stress resistance. *Terr. Arthropod Rev.* **5**,  
539 175–189 (2012).
- 540 38. C. van Dooremalen, *et al.*, Interactive effect of reduced pollen availability and Varroa  
541 destructor infestation limits growth and protein content of young honey bees. *J. Insect*  
542 *Physiol.* **59**, 487–493 (2013).
- 543 39. H. Feldhaar, *et al.*, Nutritional upgrading for omnivorous carpenter ants by the  
544 endosymbiont *Blochmannia*. *BMC Biol.* **5**, 48 (2007).
- 545 40. D. R. Sannino, A. J. Dobson, K. Edwards, E. R. Angert, N. Buchon, The *Drosophila*  
546 melanogaster Gut Microbiota Provides Thiamine to Its Host. *MBio* **9**, e00155-18 (2018).
- 547 41. T. J. Hammer, N. A. Moran, Links between metamorphosis and symbiosis in  
548 holometabolous insects. *Philos. Trans. R. Soc. B Biol. Sci.* **374**, 20190068 (2019).
- 549 42. V. Kowallik, A. S. Mikheyev, Honey Bee Larval and Adult Microbiome Life Stages Are  
550 Effectively Decoupled with Vertical Transmission Overcoming Early Life Perturbations.  
551 *MBio* **12** (2021).
- 552 43. G. Storelli, *et al.*, *Lactobacillus plantarum* Promotes *Drosophila* Systemic Growth by  
553 Modulating Hormonal Signals through TOR-Dependent Nutrient Sensing. *Cell Metab.* **14**,  
554 403–414 (2011).
- 555 44. G. A. Wright, S. W. Nicolson, S. Shafir, Nutritional Physiology and Ecology of Honey Bees.  
556 *Annu. Rev. Entomol.* **63**, 327–344 (2017).
- 557 45. D. R. Tarpy, H. R. Mattila, I. L. G. Newton, Development of the honey bee gut microbiome  
558 throughout the queen-rearing process. *Appl. Environ. Microbiol.* **81**, 3182–3191 (2015).
- 559 46. V. Corby-Harris, *et al.*, Origin and effect of Alpha 2.2 Acetobacteraceae in honey bee  
560 larvae and description of *Parasaccharibacter apium* gen. nov., sp. nov. *Appl. Environ.*  
561 *Microbiol.* **80**, 7460–7472 (2014).
- 562 47. S. Vojvodic, S. M. Rehan, K. E. Anderson, Microbial Gut Diversity of Africanized and  
563 European Honey Bee Larval Instars. *PLoS One* **8**, 72106 (2013).
- 564 48. W. K. Kwong, *et al.*, Dynamic microbiome evolution in social bees. *Sci. Adv.* **3**, e1600513

- 565 (2017).
- 566 49. A. Rortais, G. Arnold, M. P. Halm, F. Touffet-Briens, Modes of honeybees exposure to  
567 systemic insecticides: Estimated amounts of contaminated pollen and nectar consumed  
568 by different categories of bees. *Apidologie* **36**, 71–83 (2005).
- 569 50. A. Buttstedt, *et al.*, How Honeybees Defy Gravity with Royal Jelly to Raise Queens. *Curr.*  
570 *Biol.* **28**, 1095-1100.e3 (2018).
- 571 51. F. Fratini, G. Cilia, S. Mancini, A. Felicioli, Royal Jelly: An ancient remedy with remarkable  
572 antibacterial properties. *Microbiol. Res.* **192**, 130–141 (2016).
- 573 52. R. Fontana, *et al.*, Jelleines: A family of antimicrobial peptides from the Royal Jelly of  
574 honeybees (*Apis mellifera*). *Peptides* **25**, 919–928 (2004).
- 575 53. Z. P. Rokop, M. A. Horton, I. L. G. Newton, Interactions between Cooccurring Lactic Acid  
576 Bacteria in Honey Bee Hives. *Appl. Environ. Microbiol.* **81**, 7261–7270 (2015).
- 577 54. K. Crailsheim, *et al.*, Standard methods for artificial rearing of *Apis mellifera* larvae. *J.*  
578 *Apic. Res.* **52**, 1–16 (2013).
- 579 55. D. R. Schmehl, H. V. V. Tomé, A. N. Mortensen, G. F. Martins, J. D. Ellis, Protocol for the in  
580 vitro rearing of honey bee (*Apis mellifera* L.) workers. *J. Apic. Res.* **55**, 113–129 (2016).
- 581 56. E. A. Smith, I. L. G. Newton, Genomic signatures of honey bee association in an acetic  
582 acid symbiont. *Genome Biol. Evol.* **12**, 1882–1894 (2020).
- 583 57. S. V. Nyholm, M. J. McFall-Ngai, The winnowing: Establishing the squid - *Vibrios*  
584 symbiosis. *Nat. Rev. Microbiol.* **2**, 632–642 (2004).
- 585 58. Y. Kikuchi, T. Hosokawa, T. Fukatsu, Insect-microbe mutualism without vertical  
586 transmission: A stinkbug acquires a beneficial gut symbiont from the environment every  
587 generation. *Appl. Environ. Microbiol.* **73**, 4308–4316 (2007).
- 588 59. H. Itoh, *et al.*, Host–symbiont specificity determined by microbe–microbe competition in  
589 an insect gut. *Proc. Natl. Acad. Sci. U. S. A.* **116**, 22673–22682 (2019).
- 590 60. R. Oono, C. G. Anderson, R. F. Denison, Failure to fix nitrogen by non-reproductive  
591 symbiotic rhizobia triggers host sanctions that reduce fitness of their reproductive  
592 clonemates. *Proc. R. Soc. B Biol. Sci.* **278**, 2698–2703 (2011).
- 593 61. S. Shigenobu, H. Watanabe, M. Hattori, Y. Sakaki, H. Ishikawa, Genome sequence of the  
594 endocellular bacterial symbiont of aphids *Buchnera* sp. APS. *Nature* **407**, 81–86 (2000).
- 595 62. R. Gil, *et al.*, The genome sequence of *Blochmannia floridanus*: Comparative analysis of  
596 reduced genomes. *Proc. Natl. Acad. Sci. U. S. A.* **100**, 9388–9393 (2003).
- 597 63. J. P. McCutcheon, N. A. Moran, Extreme genome reduction in symbiotic bacteria. *Nat.*  
598 *Rev. Microbiol.* **10**, 13–26 (2012).
- 599 64. J. J. Wernegreen, A. B. Lazarus, P. H. Degnan, Small genome of *Candidatus Blochmannia*,

- 600 the bacterial endosymbiont of *Camponotus*, implies irreversible specialization to an  
601 intracellular lifestyle. *Microbiology* **148**, 2551–2556 (2002).
- 602 65. A. K. Hansen, N. A. Moran, Aphid genome expression reveals host-symbiont cooperation  
603 in the production of amino acids. *Proc. Natl. Acad. Sci. U. S. A.* **108**, 2849–2854 (2011).
- 604 66. J. P. McCutcheon, N. A. Moran, Parallel genomic evolution and metabolic  
605 interdependence in an ancient symbiosis. *Proc. Natl. Acad. Sci.* **104**, 19392–19397 (2007).
- 606 67. G. M. Bennett, J. P. Mccutcheon, B. R. Macdonald, D. Romanovicz, N. A. Moran,  
607 Differential Genome Evolution Between Companion Symbionts in an Insect-Bacterial  
608 Symbiosis <https://doi.org/10.1128/mBio.01697-14> (November 12, 2017).
- 609 68. F. Husnik, *et al.*, Horizontal gene transfer from diverse bacteria to an insect genome  
610 enables a tripartite nested mealybug symbiosis. *Cell* **153**, 1567 (2013).
- 611 69. X. Y. Bao, *et al.*, Lysine provisioning by horizontally acquired genes promotes mutual  
612 dependence between whitefly and two intracellular symbionts. *PLOS Pathog.* **17**,  
613 e1010120 (2021).
- 614 70. J. P. McCutcheon, B. R. McDonald, N. A. Moran, Convergent evolution of metabolic roles  
615 in bacterial co-symbionts of insects. *Proc. Natl. Acad. Sci. U. S. A.* **106**, 15394–15399  
616 (2009).
- 617 71. X. Y. Bao, *et al.*, Lysine provisioning by horizontally acquired genes promotes mutual  
618 dependence between whitefly and two intracellular symbionts. *PLoS Pathog.* **17**,  
619 e1010120 (2021).
- 620 72. B. P. Brown, J. J. Wernegreen, Genomic erosion and extensive horizontal gene transfer in  
621 gut-associated Acetobacteraceae. *BMC Genomics* **20**, 1–15 (2019).
- 622 73. O. Kaftanoglu, T. A. Linksvayer, R. E. Page, Rearing Honey Bees, *Apis mellifera*, in vitro 1:  
623 Effects of Sugar Concentrations on Survival and Development. *J. Insect Sci.* **11**, 96 (2011).
- 624 74. P. Aupinel, *et al.*, Improvement of artificial feeding in a standard in vitro method for  
625 rearing *Apis mellifera* larvae. *Bull. Insectology* **58**, 107–111 (2005).
- 626 75. O. Cohen, H. Ashkenazy, F. Belinky, D. Huchon, T. Pupko, GLOOME: Gain loss mapping  
627 engine. *Bioinformatics* **26**, 2914–2915 (2010).
- 628 76. M. N. Price, A. M. Deutschbauer, A. P. Arkin, GapMind: Automated Annotation of Amino  
629 Acid Biosynthesis. *mSystems* **5** (2020).
- 630 77. H. Li, J. M. Tennessen, Preparation of drosophila larval samples for gas chromatography-  
631 mass spectrometry (GC-MS)-based metabolomics. *J. Vis. Exp.* **2018**, e57847 (2018).

632
